# Supplementary material
Source: PubMed Central journal article supplement (PMC3281537)
Supplement: supp_en.2011-1020_EN-11-1020R4_Suppfigs2.pdf [file supp_en.2011-1020_EN-11-1020R4_Suppfigs2.pdf]

SUPPLEMENTAL MATERIAL

Expression and Regulation of Human Fetal-specific CYP3A7 in Mice

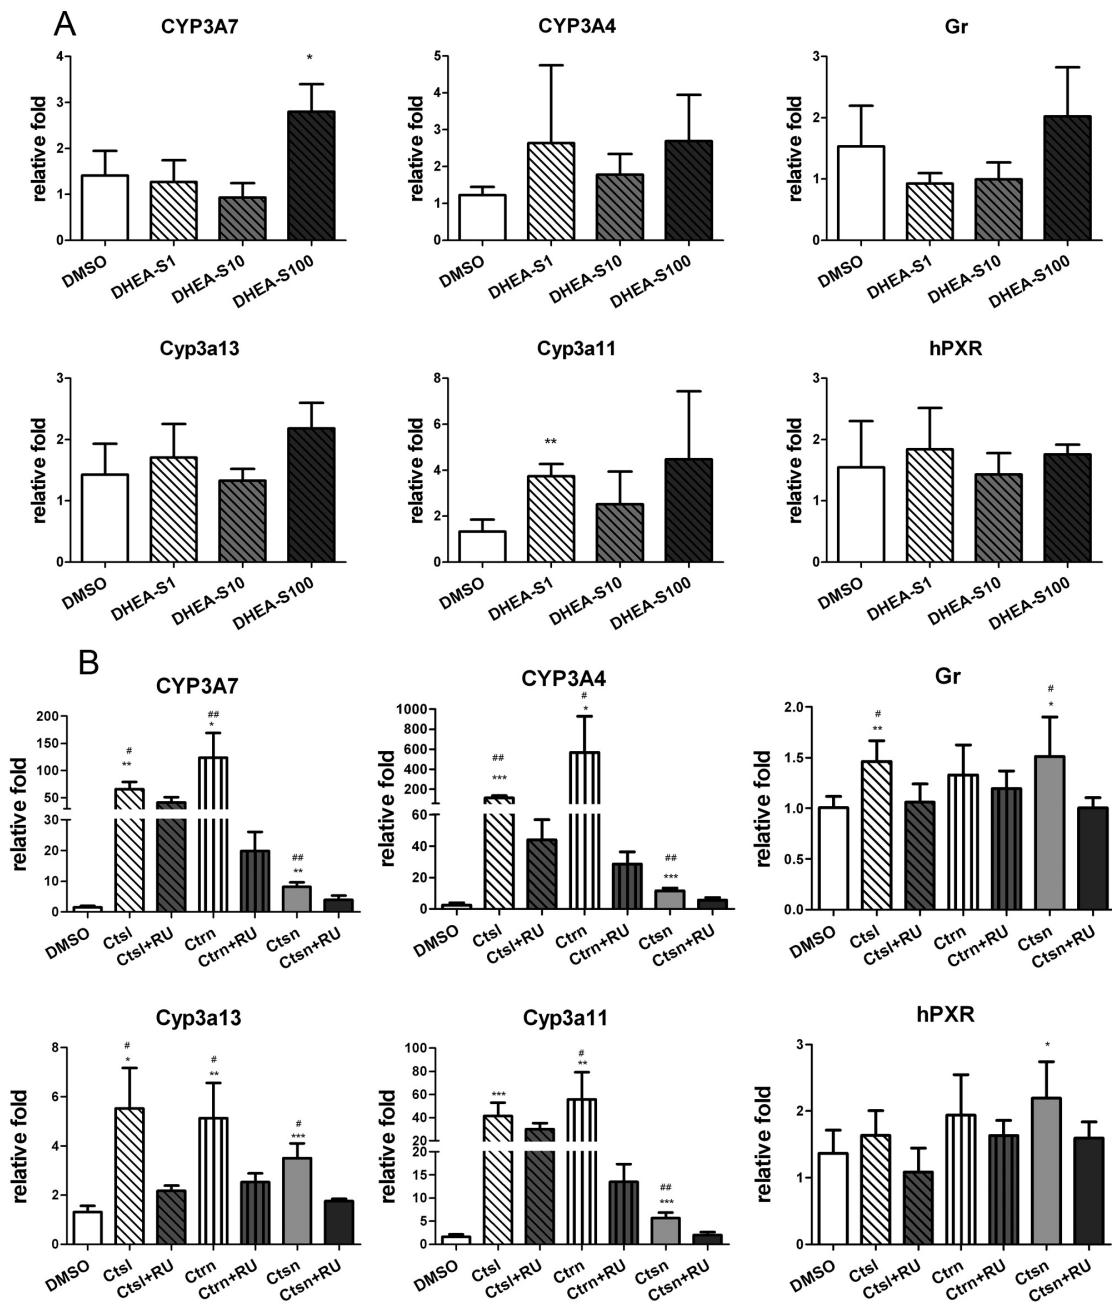

**Supplemental Fig. 1.** Quantitative real-time PCR analysis of mRNA in the hepatoblast from Tg3A4/7-hPXR mice at 16.5-day old Embryo (E16.5). Gene expression of PXR typical target genes, CYP3As, human PXR and murine glucocorticoid receptor (Gr), in the hepatoblast was detected after 3 days of treatment. (A) Treatment of 0.1% DMSO, 1/10/100  $\mu$ M DHEA-S. (B) Treatment of 0.1% DMSO, 300 nM cortisol (Ctsl), 600 nM

cortesterone (Ctrn), 300 nM cortisone (Ctsn), or co-treated with 100 nM RU486. Cells were harvested on the 3<sup>rd</sup> day for analysis of gene expression. The mRNA expression levels were quantitated by  $\Delta\Delta C_t$  method using 18S as an internal control. The relative fold of expression level at different developmental stages was expressed as mean  $\pm$  SD, n=5, \*, p<0.05, \*\*, p<0.01, \*\*\*, p<0.001 compared with cell treated with 0.1% DMSO; #, p<0.05, ##, p<0.01, compared with cell treated with 100 nM RU486.

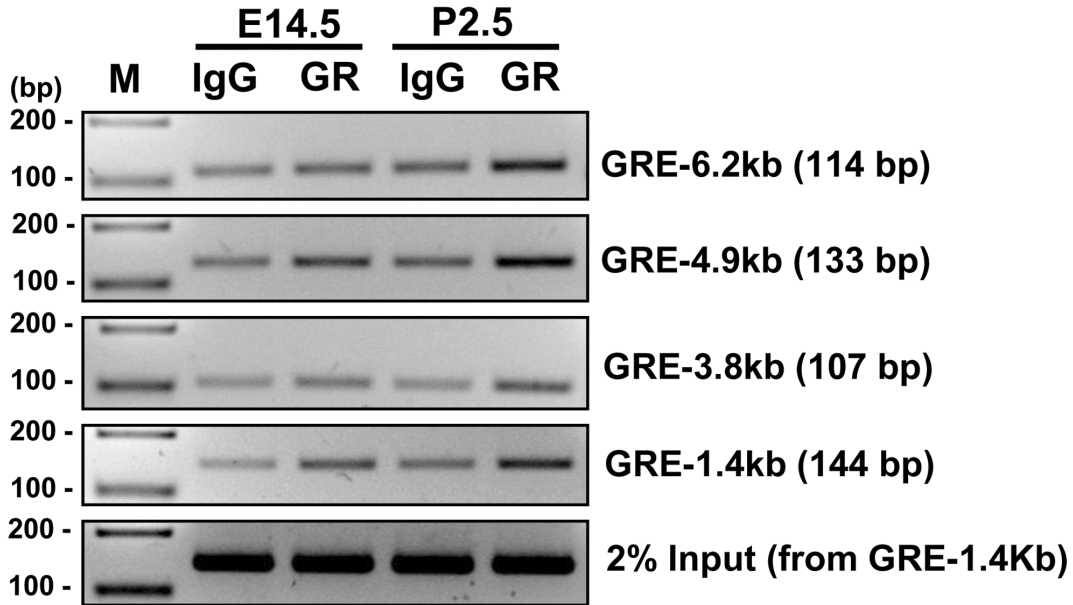

**Supplemental Fig. 2.** Histogram of the PCR fragments derived from ChIP analysis from Figure 5E. Age-related GR binding in predicted GRE binding sites determined by chromatin immunoprecipitation (ChIP) assays with E14.5 and P2.5 mouse livers.
